# Supplementary material
Source: Springer Nature journal article supplement (https://www.springermedizin.de/resource/supplementary/12998_2009_105_MOESM3_ESM.pdf/9623626)
Supplement: MOESM3 [file 9623626]

| Level of Evidence*                              | Actions Supported                                                                                                                                                                                                                                                            |
|-------------------------------------------------|------------------------------------------------------------------------------------------------------------------------------------------------------------------------------------------------------------------------------------------------------------------------------|
| High and Moderate quality<br>POSITIVE evidence  | <ul style="list-style-type: none"> <li>• Supports public <b>favorable</b> claims regarding effectiveness</li> <li>• Advise patients that this is an effective treatment choice</li> </ul>                                                                                    |
| INCONCLUSIVE, but favorable evidence            | <ul style="list-style-type: none"> <li>• Does not support any public claims regarding effectiveness</li> <li>• Recommend effective alternative if available</li> <li>• Advise patients that this is a treatment option in the absence of an effective alternative</li> </ul> |
| INCONCLUSIVE, and unclear direction of evidence | <ul style="list-style-type: none"> <li>• Recommend effective alternative if available</li> <li>• Advise patients that the effectiveness of this treatment option has not been established</li> </ul>                                                                         |
| INCONCLUSIVE, but non-favorable evidence        | <ul style="list-style-type: none"> <li>• Advise patients that this treatment option is unlikely to be effective</li> <li>• Recommend effective alternative if available</li> </ul>                                                                                           |
| High and Moderate quality<br>NEGATIVE evidence  | <ul style="list-style-type: none"> <li>• Advise patients <b>AGAINST</b> this as a treatment option</li> <li>• Recommend effective alternative if available</li> </ul>                                                                                                        |

\*See definitions for levels of evidence within the methods section.
